# Supplementary material for: Isolation and Characterization of Mosquito-Associated Spiroplasma cantharicola from Aedes japonicus Collected in Hokkaido, Japan
Source: MDPI journal article supplement (doi:10.3390/insects12121056), 2021-11-25
Supplement: s1 [file s1]

## Supplementary information

**Table S1.** Primers used in this study

| Purpose                                                        | Primer name | Sequence (5'-3')*           | Region   |
|----------------------------------------------------------------|-------------|-----------------------------|----------|
| Identification of <i>Spiroplasma</i> isolated in this study    | BF1         | AGAGTTTGATCMTGGCTC          | 16S rRNA |
|                                                                | BF2         | ACTCCTACGGGAGGCAGCAGTRGGG   |          |
|                                                                | BR2         | CCCCGTCAATTCMTTGTGATTT      |          |
|                                                                | BR1         | GACGGGCGGTGWGTRCA           |          |
| Detection of <i>Spiroplasma</i> from mosquitoes for prevalence | MF1         | ACACCATGGGAGCTGGTAAT        | 16S-23S  |
|                                                                | MR1         | CTTCWTCGACTTYCAGACCCAAGGCAT | Spacer   |

\*M: A or C, R: A or G, W: A or T, Y: C or T

**Table S2.** Detailed information on bacteria in the phylogenetic tree

| Species, strain, (accession no.)                | Serotype <sup>a</sup> | Host                                                   |
|-------------------------------------------------|-----------------------|--------------------------------------------------------|
| <i>S. diabroticae</i> strain DU-1 (NR_104751.1) | [XII]                 | <i>Diabrotica undecimpunctata</i> beetles <sup>a</sup> |
| <i>S. diabroticae</i> (GU908490.1)              | [XII]                 |                                                        |
| <i>E. melaleucae</i> strain M1 (NR_042854.1)    |                       | <i>Melaleuca quinquenervia</i> <sup>b</sup>            |
| <i>S. floricola</i> strain 23-6 (NR_025703.1)   | [III]                 | Insects, flower <sup>a</sup>                           |
| <i>S. floricola</i> 23-6 (CP025057.1)           | [III]                 |                                                        |
| <i>Spiroplasma</i> sp. W115 (AY189317.1)        | [XXI]                 | <i>Prunus</i> sp. flowers <sup>a</sup>                 |
| <i>Spiroplasma</i> sp. BIUS-1 (AY189319.1)      | [XXX]                 |                                                        |
| <i>Spiroplasma</i> sp. BIUS-1 (CP048386.1)      | [XXX]                 | <i>Bidens</i> sp. <sup>b</sup>                         |
| <i>S. diminutum</i> CUAS-1 (NR_121702.1)        | [XXV]                 | <i>Culex</i> mosquito <sup>a</sup>                     |
| <i>S. diminutum</i> strain CUAS-1 (NR_025702.1) | [XXV]                 |                                                        |
| <i>S. diminutum</i> CUAS-1 (CP005076.1)         | [XXV]                 |                                                        |
| <i>Spiroplasma</i> sp. CB-1 (AY189315.1)        | [XVI-2]               | Cantharid beetle <sup>a</sup>                          |
| <i>S. cantharicola</i> strain CC-1              | [XVI-1]               |                                                        |

|                                                      |         |                                        |                                   |
|------------------------------------------------------|---------|----------------------------------------|-----------------------------------|
| (CP012622.1)                                         |         |                                        |                                   |
| <i>S. cantharicola</i> strain Q-6<br>(DQ861915.1)    |         |                                        |                                   |
| <i>S. cantharicola</i> strain CC-1<br>(NR_125516.1)  | [XVI-1] |                                        | Cantharid beetle <sup>a</sup>     |
| <i>S. cantharicola</i> strain CC-1<br>(DQ861914.1)   | [XVI-1] |                                        |                                   |
| <i>Spiroplasma</i> sp. Ar-1357<br>(AY189316.1)       | [XVI-3] |                                        | Mosquito <sup>a</sup>             |
| <i>S. cantharicola</i> strain AR1357<br>(DQ861916.1) |         |                                        |                                   |
| <i>S. monobiae</i> MQ-1 (CP025543.1)                 | [VII]   | <i>Monobia quadridens</i> <sup>b</sup> | <i>Monobia</i> wasps <sup>a</sup> |
| <i>S. monobiae</i> strain MQ-1<br>(NR_104854.1)      | [VII]   |                                        |                                   |
| <i>S. citri</i> strain R8A2HP<br>(NR_036849.2)       | [I-1]   |                                        | Dicots, leafhoppers <sup>a</sup>  |

---

<sup>a</sup>Information on serotype and host was retrieved from Regassa L.B. *et al* [2].

<sup>b</sup>Information on host was retrieved from Genbank site because it was not available in the reference [2].

**Table S3.** Detailed information of samples

| Mosquito Pool ID | Species            | Sex    | Number of Mosquitoes | Collection site | Collection date | PCR | BLAST search result  |
|------------------|--------------------|--------|----------------------|-----------------|-----------------|-----|----------------------|
| 1                | <i>Aedes togoi</i> | Male   | 1                    | Otaru aquarium  | 11th Aug 2016   | -   |                      |
| 2                | <i>Aedes togoi</i> | Male   | 3                    | Otaru aquarium  | 11th Aug 2016   | -   |                      |
| 3                | <i>Aedes togoi</i> | Male   | 5                    | Otaru aquarium  | 25th Aug 2016   | -   |                      |
| 4                | <i>Aedes togoi</i> | Male   | 20                   | Otaru aquarium  | 25th Aug 2016   | -   |                      |
| 5                | <i>Aedes togoi</i> | Male   | 8                    | Otaru aquarium  | 25th Aug 2016   | -   |                      |
| 6                | <i>Aedes togoi</i> | Male   | 1                    | Otaru aquarium  | 12th Sep 2016   | -   |                      |
| 7                | <i>Aedes togoi</i> | Male   | 9                    | Otaru aquarium  | 12th Sep 2016   | -   |                      |
| 8                | <i>Aedes togoi</i> | Male   | 20                   | Otaru aquarium  | 12th Sep 2016   | -   |                      |
| 9                | <i>Aedes togoi</i> | Male   | 2                    | Otaru aquarium  | 12th Sep 2016   | -   |                      |
| 10               | <i>Aedes togoi</i> | Male   | 8                    | Otaru aquarium  | 27th Sep 2016   | -   |                      |
| 11               | <i>Aedes togoi</i> | Female | 5                    | Otaru aquarium  | 20th Jul 2016   | -   |                      |
| 12               | <i>Aedes togoi</i> | Female | 1                    | Otaru aquarium  | 20th Jul 2016   | -   |                      |
| 13               | <i>Aedes togoi</i> | Female | 4                    | Otaru aquarium  | 20th Jul 2016   | -   |                      |
| 14               | <i>Aedes togoi</i> | Female | 6                    | Otaru aquarium  | 11th Aug 2016   | +   | nonspecific reaction |
| 15               | <i>Aedes togoi</i> | Female | 1                    | Otaru aquarium  | 25th Aug 2016   | -   |                      |
| 16               | <i>Aedes togoi</i> | Female | 17                   | Otaru aquarium  | 25th Aug 2016   | -   |                      |
| 17               | <i>Aedes togoi</i> | Female | 2                    | Otaru aquarium  | 12th Sep 2016   | +   | nonspecific reaction |
| 18               | <i>Aedes togoi</i> | Female | 1                    | Otaru aquarium  | 12th Sep 2016   | -   |                      |
| 19               | <i>Aedes togoi</i> | Female | 3                    | Otaru aquarium  | 12th Sep 2016   | -   |                      |

|    |                        |        |    |                     |               |   |                      |
|----|------------------------|--------|----|---------------------|---------------|---|----------------------|
| 20 | <i>Aedes togoi</i>     | Female | 7  | Otaru aquarium      | 12th Sep 2016 | - |                      |
| 21 | <i>Aedes togoi</i>     | Female | 14 | Otaru aquarium      | 12th Sep 2016 | - |                      |
| 22 | <i>Aedes togoi</i>     | Female | 1  | Otaru aquarium      | 27th Sep 2016 | - |                      |
| 23 | <i>Aedes togoi</i>     | Female | 1  | Otaru aquarium      | 27th Sep 2016 | - |                      |
| 24 | <i>Aedes togoi</i>     | Female | 15 | Otaru aquarium      | 27th Sep 2016 | - |                      |
| 25 | <i>Aedes japonicus</i> | Male   | 8  | Otaru aquarium      | 20th Jul 2016 | + | nonspecific reaction |
| 26 | <i>Aedes japonicus</i> | Male   | 20 | Otaru aquarium      | 20th Jul 2016 | - |                      |
| 27 | <i>Aedes japonicus</i> | Male   | 20 | Otaru aquarium      | 20th Jul 2016 | - |                      |
| 28 | <i>Aedes japonicus</i> | Male   | 20 | Otaru aquarium      | 20th Jul 2016 | - |                      |
| 29 | <i>Aedes japonicus</i> | Male   | 7  | Otaru aquarium      | 25th Aug 2016 | - |                      |
| 30 | <i>Aedes japonicus</i> | Male   | 3  | Otaru aquarium      | 12th Sep 2016 | - |                      |
| 31 | <i>Aedes japonicus</i> | Female | 1  | Otaru aquarium      | 6th Jul 2016  | - |                      |
| 32 | <i>Aedes japonicus</i> | Female | 7  | Otaru aquarium      | 20th Jul 2016 | - |                      |
| 33 | <i>Aedes japonicus</i> | Female | 20 | Otaru aquarium      | 11th Aug 2016 | - |                      |
| 34 | <i>Aedes japonicus</i> | Female | 20 | Otaru aquarium      | 11th Aug 2016 | - |                      |
| 35 | <i>Aedes japonicus</i> | Female | 20 | Otaru aquarium      | 11th Aug 2016 | - |                      |
| 36 | <i>Aedes japonicus</i> | Female | 1  | Otaru aquarium      | 11th Aug 2016 | - |                      |
| 37 | <i>Aedes japonicus</i> | Female | 15 | Otaru aquarium      | 12th Sep 2016 | - |                      |
| 38 | <i>Aedes japonicus</i> | Female | 20 | Otaru aquarium      | 12th Sep 2016 | - |                      |
| 39 | <i>Aedes japonicus</i> | Female | 20 | Otaru aquarium      | 27th Sep 2016 | - |                      |
| 40 | <i>Aedes japonicus</i> | Female | 20 | Otaru aquarium      | 27th Sep 2016 | - |                      |
| 41 | <i>Aedes japonicus</i> | Male   | 1  | Rakuno Gakuen Univ. | 15th Jul 2020 | - |                      |

|    |                           |        |    |                     |               |   |
|----|---------------------------|--------|----|---------------------|---------------|---|
| 42 | <i>Aedes japonicus</i>    | Female | 10 | Rakuno Gakuen Univ. | 24th Jun 2020 | - |
| 43 | <i>Aedes japonicus</i>    | Female | 8  | Rakuno Gakuen Univ. | 24th Jun 2020 | - |
| 44 | <i>Aedes japonicus</i>    | Female | 10 | Rakuno Gakuen Univ. | 14th Jul 2020 | - |
| 45 | <i>Aedes japonicus</i>    | Female | 1  | Rakuno Gakuen Univ. | 14th Jul 2020 | - |
| 46 | <i>Aedes japonicus</i>    | Female | 8  | Rakuno Gakuen Univ. | 15th Jul 2020 | - |
| 47 | <i>Aedes japonicus</i>    | Female | 1  | Rakuno Gakuen Univ. | 15th Jul 2020 | - |
| 48 | <i>Aedes japonicus</i>    | Female | 10 | Rakuno Gakuen Univ. | 20th Aug 2020 | - |
| 49 | <i>Aedes japonicus</i>    | Female | 10 | Rakuno Gakuen Univ. | 20th Aug 2020 | - |
| 50 | <i>Aedes japonicus</i>    | Female | 8  | Rakuno Gakuen Univ. | 20th Aug 2020 | - |
| 51 | <i>Aedes japonicus</i>    | Female | 10 | Rakuno Gakuen Univ. | 15th Jul 2020 | - |
| 52 | <i>Aedes japonicus</i>    | Female | 10 | Rakuno Gakuen Univ. | 15th Jul 2020 | - |
| 53 | <i>Aedes japonicus</i>    | Female | 9  | Rakuno Gakuen Univ. | 15th Jul 2020 | - |
| 54 | <i>Aedes japonicus</i>    | Female | 1  | Rakuno Gakuen Univ. | 15th Jul 2020 | - |
| 55 | <i>Aedes japonicus</i>    | Male   | 4  | Nopporo Forest Park | 20th Aug 2020 | - |
| 56 | <i>Aedes japonicus</i>    | Female | 4  | Nopporo Forest Park | 20th Aug 2020 | - |
| 57 | <i>Aedes japonicus</i>    | Female | 6  | Nopporo Forest Park | 8th Sep 2020  | - |
| 58 | <i>Aedes japonicus</i>    | Female | 3  | Nopporo Forest Park | 20th Aug 2020 | - |
| 59 | <i>Aedes hokkaidensis</i> | Female | 1  | Rakuno Gakuen Univ. | 24th Jun 2020 | - |
| 60 | <i>Aedes hokkaidensis</i> | Female | 1  | Rakuno Gakuen Univ. | 24th Jun 2020 | - |
| 61 | <i>Aedes hokkaidensis</i> | Female | 1  | Rakuno Gakuen Univ. | 24th Jun 2020 | - |
| 62 | <i>Aedes hokkaidensis</i> | Female | 2  | Rakuno Gakuen Univ. | 14th Jul 2020 | - |
| 63 | <i>Aedes galloisi</i>     | Male   | 3  | Nopporo Forest Park | 20th Aug 2020 | - |

|    |                            |        |   |                     |                 |   |                       |
|----|----------------------------|--------|---|---------------------|-----------------|---|-----------------------|
| 64 | <i>Aedes galloisi</i>      | Male   | 3 | Nopporo Forest Park | 20th Aug 2020   | - |                       |
| 65 | <i>Aedes galloisi</i>      | Male   | 4 | Nopporo Forest Park | 20th Aug 2020   | - |                       |
| 66 | <i>Aedes galloisi</i>      | Male   | 1 | Nopporo Forest Park | 8th Sep 2020    | - |                       |
| 67 | <i>Aedes galloisi</i>      | Female | 3 | Nopporo Forest Park | 20th Aug 2020   | - |                       |
| 68 | <i>Aedes galloisi</i>      | Female | 2 | Nopporo Forest Park | 20th Aug 2020   | - |                       |
| 69 | <i>Aedes galloisi</i>      | Female | 2 | Nopporo Forest Park | 20th Aug 2020   | - |                       |
| 70 | <i>Aedes galloisi</i>      | Female | 1 | Nopporo Forest Park | 20th Aug 2020   | - |                       |
| 71 | <i>Aedes galloisi</i>      | Female | 2 | Nopporo Forest Park | 8th Sep 2020    | - |                       |
| 72 | <i>Aedes galloisi</i>      | Female | 3 | Nopporo Forest Park | 8th Sep 2020    | - |                       |
| 73 | <i>Aedes galloisi</i>      | Female | 1 | Nopporo Forest Park | 8th Sep 2020    | - |                       |
| 74 | <i>Aedes galloisi</i>      | Female | 2 | Nopporo Forest Park | 20th Aug 2020   | + | nonspecific reaction* |
| 75 | <i>Aedes albopictus</i>    | Female | 2 | laboratory-colony   | 30th Sep 2020   | - |                       |
| 76 | <i>Aedes albopictus</i>    | Female | 2 | laboratory-colony   | 30th Sep 2020   | - |                       |
| 77 | <i>Aedes albopictus</i>    | Female | 2 | laboratory-colony   | 30th Sep 2020   | - |                       |
| 78 | <i>Aedes albopictus</i>    | Female | 2 | laboratory-colony   | 30th Sep 2020   | - |                       |
| 79 | <i>Aedes albopictus</i>    | Female | 2 | laboratory-colony   | 30th Sep 2020   | - |                       |
| 80 | <i>Aedes aegypti</i>       | Female | 2 | laboratory-colony   | 30th Sep 2020   | - |                       |
| 81 | <i>Aedes aegypti</i>       | Female | 2 | laboratory-colony   | 30th Sep 2020   | - |                       |
| 82 | <i>Aedes aegypti</i>       | Female | 2 | laboratory-colony   | 30th Sep 2020   | - |                       |
| 83 | <i>Aedes aegypti</i>       | Female | 2 | laboratory-colony   | 30th Sep 2020   | - |                       |
| 84 | <i>Aedes aegypti</i>       | Female | 2 | laboratory-colony   | 30th Sep 2020   | - |                       |
| 85 | <i>Culex pipiens</i> group | Male   | 1 | Rakuno Gakuen Univ. | Sep to Oct 2020 | - |                       |

|     |                             |        |    |                     |                 |   |                       |
|-----|-----------------------------|--------|----|---------------------|-----------------|---|-----------------------|
| 86  | <i>Culex pipiens</i> group  | Male   | 1  | Rakuno Gakuen Univ. | Sep to Oct 2020 | - |                       |
| 87  | <i>Culex pipiens</i> group  | Male   | 1  | Rakuno Gakuen Univ. | Sep to Oct 2020 | - |                       |
| 88  | <i>Culex pipiens</i> group  | Female | 10 | Rakuno Gakuen Univ. | Sep to Oct 2020 | + | nonspecific reaction  |
| 89  | <i>Culex pipiens</i> group  | Female | 10 | Rakuno Gakuen Univ. | Sep to Oct 2020 | + | nonspecific reaction  |
| 90  | <i>Culex pipiens</i> group  | Female | 10 | Rakuno Gakuen Univ. | Sep to Oct 2020 | + | nonspecific reaction  |
| 91  | <i>Culex pipiens</i> group  | Female | 10 | Rakuno Gakuen Univ. | Sep to Oct 2020 | + | nonspecific reaction  |
| 92  | <i>Culex pipiens</i> group  | Female | 10 | Rakuno Gakuen Univ. | Sep to Oct 2020 | + | nonspecific reaction  |
| 93  | <i>Culex pipiens</i> group  | Female | 10 | Rakuno Gakuen Univ. | Sep to Oct 2020 | + | nonspecific reaction  |
| 94  | <i>Culex pipiens</i> group  | Female | 4  | Rakuno Gakuen Univ. | Sep to Oct 2020 | - |                       |
| 95  | <i>Culex orientalis</i>     | Female | 3  | Rakuno Gakuen Univ. | Sep to Oct 2020 | - |                       |
| 96  | <i>Culex orientalis</i>     | Female | 3  | Rakuno Gakuen Univ. | Sep to Oct 2020 | - |                       |
| 97  | <i>Culex orientalis</i>     | Female | 3  | Rakuno Gakuen Univ. | Sep to Oct 2020 | + | nonspecific reaction* |
| 98  | <i>Culex orientalis</i>     | Female | 3  | Rakuno Gakuen Univ. | Sep to Oct 2020 | - |                       |
| 99  | <i>Culex orientalis</i>     | Female | 3  | Rakuno Gakuen Univ. | Sep to Oct 2020 | - |                       |
| 100 | <i>Culex orientalis</i>     | Female | 3  | Rakuno Gakuen Univ. | Sep to Oct 2020 | - |                       |
| 101 | <i>Culex orientalis</i>     | Female | 3  | Rakuno Gakuen Univ. | Sep to Oct 2020 | + | nonspecific reaction* |
| 102 | <i>Culex orientalis</i>     | Female | 2  | Rakuno Gakuen Univ. | Sep to Oct 2020 | + | nonspecific reaction* |
| 103 | <i>Anopheles sineroides</i> | Female | 1  | Rakuno Gakuen Univ. | Sep to Oct 2020 | - |                       |

---

\*Possibly a reaction against mosquito DNA.
